# Supplementary material
Source: HighWire-hosted journal article supplement (http://www.cmaj.ca/highwire/filestream/148238/field_highwire_adjunct_files/0/220453-res-1-at.pdf)
Supplement: 220453-res-1-at.pdf [file 220453-res-1-at.pdf]

**Supplemental Table 1: Antenatal Risk Assessment Tool**

|                                 | <b>Risk Variable</b>                                          | <b>Definition</b>                                                                                                                                                                                  | <b>Score</b>                         |
|---------------------------------|---------------------------------------------------------------|----------------------------------------------------------------------------------------------------------------------------------------------------------------------------------------------------|--------------------------------------|
| <b>Pre-pregnancy</b>            | Age                                                           | Age at delivery                                                                                                                                                                                    | 1 if $\leq 17$ or<br>2 if $\geq 35$  |
|                                 | Weight                                                        | Mother's weight (kg) before pregnancy or $\leq 11$ weeks completed gestation                                                                                                                       | 1 if $\geq 91$ kg or<br>$\leq 45$ kg |
|                                 | Height                                                        | Mother's height (centimeters)                                                                                                                                                                      | 1 if $< 152$ cm                      |
|                                 | Diabetes controlled by diet only                              | Pre-existing diabetes mellitus Type 1 or Type 2, insulin not used                                                                                                                                  | 1                                    |
|                                 | Insulin used                                                  | Pre-existing diabetes mellitus Type 1 or Type 2, insulin used                                                                                                                                      | 3                                    |
|                                 | Retinopathy documented                                        | Extracted from ICD                                                                                                                                                                                 | 3                                    |
|                                 | <i>Asymptomatic heart disease (no effect on daily living)</i> | <i>Pre-pregnancy status not available</i>                                                                                                                                                          | 1                                    |
|                                 | Symptomatic heart disease (affects daily living)              | Extracted from ICD I00-I95                                                                                                                                                                         | 3                                    |
|                                 | <i>140/90 or greater</i>                                      | <i>Pre-pregnancy status not available</i>                                                                                                                                                          | 2                                    |
|                                 | <i>Antihypertensive drugs</i>                                 | <i>Pre-pregnancy status not available</i>                                                                                                                                                          | 3                                    |
|                                 | Chronic renal disease documented                              | Mother had hypertension associated with chronic renal disease in the current pregnancy                                                                                                             | 3                                    |
|                                 | Other medical disorders                                       | Extracted from ICD: multiple sclerosis, irritable bowel syndrome, ulcerative colitis, Crohn's disease, rheumatoid arthritis, lupus, chronic lung diseases, coagulation defects, malignant neoplasm | 1                                    |
| <b>Past Obstetrical History</b> | Neonatal death(s)                                             | Mother had at least one prior live born infant who died within the first 28 days of life.                                                                                                          | 3                                    |
|                                 | Stillbirth(s)                                                 | Mother had at least one prior stillbirth or intrauterine death documented                                                                                                                          | 3                                    |
|                                 | Spontaneous abortion                                          | Previous natural or spontaneous pregnancy losses in pregnancy $< 20$ completed weeks and $< 500$ grams                                                                                             | 1                                    |
|                                 | Preterm birth                                                 | Previous pregnancies delivered between 20 to 36 completed weeks gestation                                                                                                                          | 1                                    |
|                                 | Cesarean section                                              | Previous pregnancies resulting in a cesarean section $\geq 20$ completed weeks gestation                                                                                                           | 2                                    |

|                                      |                                             |                                                                                                                                                                             |   |
|--------------------------------------|---------------------------------------------|-----------------------------------------------------------------------------------------------------------------------------------------------------------------------------|---|
|                                      | Low birth weight                            | Small for gestational age < 5th percentile, or < 2500g at ≥ 20 weeks gestation                                                                                              | 1 |
|                                      | Macrosomia                                  | Large for gestational age > 95th percentile, or birth weight >4000g                                                                                                         | 1 |
|                                      | Rh isoimmunization - unaffected infant      | Mother had a previous pregnancy in which isoimmunization occurred                                                                                                           | 1 |
|                                      | <i>Rh isoimmunization - affected infant</i> | <i>Not available</i>                                                                                                                                                        | 3 |
|                                      | Major congenital anomaly                    | Mother had at least one previous pregnancy in which the baby or fetus displayed a major congenital anomaly                                                                  | 1 |
| <b>Problems in Current Pregnancy</b> | Diagnosis of large for dates                | Extracted from ICD O36.6: Maternal care for excessive fetal growth                                                                                                          | 2 |
|                                      | Diagnosis of small for dates                | Extracted from ICD O36.5: Maternal care for known or suspected poor fetal growth                                                                                            | 3 |
|                                      | Polyhydramnios or oligohydramnios           | Extracted from ICD O40: abnormally high amniotic fluid volume, such as greater than 2,000 mL in the last trimester; <u>or</u> ICD O41: abnormally low amniotic fluid volume | 2 |
|                                      | Multiple pregnancy                          | Two or more fetuses in the current pregnancy                                                                                                                                | 3 |
|                                      | Malpresentation                             | Extracted from ICD O32: Maternal care for fetal malpresentation                                                                                                             | 3 |
|                                      | Membranes ruptured before 37 weeks          | Extracted from ICD: Spontaneous rupture of membranes before 37 weeks of gestation                                                                                           | 2 |
|                                      | Antepartum hemorrhage <20 weeks             | Antepartum bleeding in pregnancy < 20 weeks gestation                                                                                                                       | 1 |
|                                      | Antepartum hemorrhage >20 weeks             | Antepartum bleeding in pregnancy ≥ 20 weeks gestation                                                                                                                       | 3 |
|                                      | Gestational hypertension                    | Diagnosed with gestational hypertension during the current pregnancy                                                                                                        | 2 |
|                                      | Proteinuria >1g/L                           | Diagnosed proteinuria during the current pregnancy                                                                                                                          | 1 |
|                                      | Gestational diabetes                        | Diabetes first seen in a pregnant woman who did not have pre-pregnancy diabetes (insulin or non-insulin dependent diabetes)                                                 | 1 |
|                                      | Rh blood antibodies                         | Mother developed or showed signs of Rh (anti-D) antibodies in her blood in the current pregnancy                                                                            | 3 |

|                           |                                                |                                                                                                                                                                                                                         |   |
|---------------------------|------------------------------------------------|-------------------------------------------------------------------------------------------------------------------------------------------------------------------------------------------------------------------------|---|
|                           | Anaemia                                        | Extracted from ICD: Hgb <100 g per L in pregnancy                                                                                                                                                                       | 1 |
|                           | Late term or post term                         | Gestational age at delivery >41 weeks                                                                                                                                                                                   | 1 |
|                           | Poor maternal weight gain                      | Extracted from ICD                                                                                                                                                                                                      | 1 |
|                           | Current smoker                                 | Mother smoked tobacco products during pregnancy                                                                                                                                                                         | 1 |
| <b>Other Risk Factors</b> | Suspected fetal abnormality and damage         | Extracted from ICD (O35)                                                                                                                                                                                                | 3 |
|                           | Acute medical disorder                         | Extracted from ICD: thyrotoxicosis, acute asthma, genitourinary infection, hyperemesis gravidarum, eclampsia, epilepsy and recurrent seizures, HELLP syndrome, acute cholestasis, obstetric embolism, acute fatty liver | 3 |
|                           | Abnormalities of cervix                        | Extracted from ICD (O34)                                                                                                                                                                                                | 3 |
|                           | Alcohol use                                    | Care provider lists mother's use of alcohol as a risk factor in this pregnancy                                                                                                                                          | 3 |
|                           | Alcohol > 1 drink per day throughout pregnancy | Average number of alcoholic drinks consumed per week by mother during current pregnancy (7 or more)                                                                                                                     | 3 |

Footnote: We list age and weight once rather than twice, but maintained the original scoring instructions. Finally, we used 2 items to assess substance use (instead of 3 items) because data on drug dependency was not available in the database.
